# Supplementary material for: Elevated serum level of pancreatic stone protein/regenerating protein (PSP/reg) is observed in diabetic kidney disease
Source: PubMed Central journal article supplement (PMC5503521; doi:10.18632/oncotarget.16369), 2017-03-18
Supplement: oncotarget-08-38145-s001.pdf [file oncotarget-08-38145-s001.pdf]

## Elevated serum level of pancreatic stone protein/regenerating protein (PSP/reg) is observed in diabetic kidney disease

### Supplementary Material

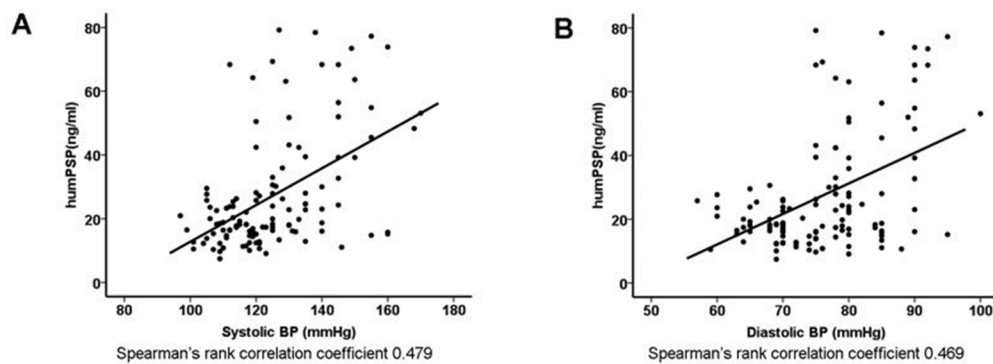

**Supplementary Figure S1: Correlation analysis of PSP/reg and blood pressure.** A. Correlation of PSP/reg with systolic blood pressure (Spearman  $r = 0.479$ ,  $p < 0.001$ ). B. Correlation of PSP/reg with diastolic blood pressure (Spearman  $r = 0.469$ ,  $p < 0.001$ ).
